# Supplementary material for: Water-soluble cyclodiphosphazanes: synthesis, gold(i) metal complexes and their in vitro antitumor studies
Source: Royal Society of Chemistry journal article supplement (doi:10.1039/b804026p), 2008-01-01
Supplement: b804026p.pdf [file b804026p.pdf]

### Supporting information

#### General Procedures

All experimental manipulations were carried out under a dry nitrogen or argon atmosphere, using standard Schlenk techniques unless otherwise stated. Solvents were dried and distilled prior to use by conventional methods. The precursors *cis*-[(<sup>t</sup>BuNH)<sub>2</sub>(μ-N<sup>t</sup>BuP)<sub>2</sub>],<sup>1</sup> *cis*-[(MeNC<sub>4</sub>H<sub>8</sub>N)<sub>2</sub>(μ-N<sup>t</sup>BuP)<sub>2</sub>],<sup>2</sup> *cis*-[(μ-N<sup>t</sup>BuP)<sub>2</sub>(OCH<sub>2</sub>CH<sub>2</sub>NMe<sub>2</sub>)<sub>2</sub>],<sup>3</sup> *trans*-[(μ-N<sup>t</sup>BuPO)<sub>2</sub>(SeCH<sub>2</sub>CH<sub>2</sub>NMe<sub>2</sub>)<sub>2</sub>]<sup>4</sup> and [(Me<sub>2</sub>S)AuCl]<sup>5</sup> were prepared according to the literature procedures. The <sup>1</sup>H and <sup>31</sup>P{<sup>1</sup>H} NMR (δ in ppm) spectra were obtained on a Varian VXR 400 spectrometer operating at frequencies of 400 and 162 MHz, respectively. The tetramethylsilane and 85% H<sub>3</sub>PO<sub>4</sub> were used as internal and external standards for <sup>1</sup>H and <sup>31</sup>P{<sup>1</sup>H} NMR respectively. Positive shifts lie downfield of the standard in all the cases. Microanalyses were carried out on a Carlo Erba Model 1106 elemental analyzer. Melting points of all compounds were determined on Veego melting point apparatus and are uncorrected.

#### Synthesis of *cis*-[{<sup>t</sup>BuN(H)P(μ-N<sup>t</sup>Bu)<sub>2</sub>P(CH<sub>3</sub>)N(H)<sup>t</sup>Bu}(I)] (2).

To a solution of *cis*-[(<sup>t</sup>BuNH)<sub>2</sub>(μ-N<sup>t</sup>BuP)<sub>2</sub>] (0.50 g, 1.43 mmol) in petroleum ether (10 mL) added 1 mL of MeI also in petroleum ether (15 mL) dropwise over a period of 10 minutes at room temperature during which time the solution turns turbid. The reaction mixture was heated under reflux condition for 2 h. The solution was brought to room temperature and the product was separated by filtration. The product was washed several times with cold petroleum ether and dissolved in dichloromethane, layered with 2 mL of petroleum ether, and placed at -25 °C for 18 h to afford **1** as white crystalline compound. Yield: 90% (0.633 g, 1.29 mmol). Mp: 198-200 °C. <sup>1</sup>H NMR (400 MHz, CDCl<sub>3</sub>, δ):

Supplementary Material (ESI) for Dalton Transactions  
This journal is (c) The Royal Society of Chemistry 2008

7.05 (d,  $^2J_{\text{PH}} = 14.4$  Hz, *NH*, 1H), 2.30 (d,  $^2J_{\text{PH}} = 13.2$  Hz, *NH*, 1H), 1.65 (s, *CH*<sub>3</sub>, 3H), 1.60 (s, *tBu*, 9H), 1.34 (s, *tBu*, 18H), 1.32 (s, *tBu*, 9H).  $^{31}\text{P}\{^1\text{H}\}$  NMR (161.8 MHz,  $\text{CDCl}_3$ ,  $\delta$ ): 80.4 (s), 19.6 (s). Anal. Calcd. for  $\text{C}_{17}\text{H}_{41}\text{N}_4\text{P}_2\text{I}$ : C, 41.63; H, 8.42; N, 11.42%. Found: C, 41.47; H, 8.58; N, 11.72%.

**Synthesis of *cis*-[ $\{(\text{Me}_2\text{NC}_4\text{H}_8\text{N})\text{P}(\mu\text{-N}^t\text{Bu})_2\text{P}(\text{CH}_3)(\text{NC}_4\text{H}_8\text{NMe}_2)\}(\text{I})_3$ ] (4).**

Added 2 mL of MeI in 15 mL of dichloromethane to a stirred solution of *cis*-[ $(\mu\text{-N}^t\text{BuP})_2(\text{NC}_4\text{H}_8\text{NMe}_2)_2$ ] (0.90 g, 2.23 mmol) in 10 mL of dichloromethane over a period of 10 min. The clear solution turns turbid immediately after the addition of methyl iodide. The reaction mixture was allowed to stir at room temperature for further 4 h during which time the compounds get precipitated. The residue was separated by filtration, was washed several times with dichloromethane and dried under vacuum to afford **2** as white crystalline solid. Yield: 85% (1.57 g, 1.90 mmol). Mp: 212-214 °C.  $^1\text{H}$  NMR (400 MHz,  $\text{D}_2\text{O}$ ,  $\delta$ ): 3.80-3.29 (m, *C*<sub>4</sub>*H*<sub>8</sub>, 16H), 3.27 (s, *NMe*<sub>2</sub>, 6H), 3.19 (s, *NMe*<sub>2</sub>, 6H), 1.38 (s, *tBu*, 18H), 1.37 (s, *CH*<sub>3</sub>, 3H).  $^{31}\text{P}\{^1\text{H}\}$  NMR (161.8 MHz,  $\text{D}_2\text{O}$ ,  $\delta$ ): 87.1 (s), 35.1 (s). Anal. Calcd. for  $\text{C}_{21}\text{H}_{49}\text{P}_2\text{N}_6\text{I}_3$ : C, 30.45; H, 5.96; N, 10.15%. Found: C, 30.86; H, 5.68; N, 10.72%.

**Synthesis of *cis*-[ $\{(\mu\text{-N}^t\text{BuP})_2(\text{OCH}_2\text{CH}_2\text{NMe}_3)_2\}(\text{I})_2$ ] (6).**

In a manner identical to that used for the synthesis of **7**, *cis*-[ $(\mu\text{-N}^t\text{BuP})_2(\text{OCH}_2\text{CH}_2\text{NMe}_2)_2$ ] (1.12 g, 2.94 mmol) and MeI of 3 mL were allowed to react. Yield: 95% (1.86 g, 2.79 mmol). Mp: 148-150 °C.  $^1\text{H}$  NMR (400 MHz,  $\text{D}_2\text{O}$ ,  $\delta$ ): 4.35 (t,  $J_{\text{HH}} = 9.8$  Hz, *OCH*<sub>2</sub>, 4H),  $\delta$  3.62 (t,  $J_{\text{HH}} = 8.4$  Hz, *NCH*<sub>2</sub>, 4H), 3.21 (s, *Nme*, 18H), 1.31 (s, *tBu*, 18H).  $^{31}\text{P}\{^1\text{H}\}$  NMR (161.8 MHz,  $\text{D}_2\text{O}$ ,  $\delta$ ): 132.9 (s). Anal. Calcd. for  $\text{C}_{18}\text{H}_{44}\text{N}_4\text{P}_2\text{O}_2\text{I}_2$ : C, 32.54; H, 6.67; N, 8.43%. Found: C, 32.86; H, 6.86; N, 8.72%.

**Synthesis of *cis*-[<sup>t</sup>BuN(H)P(AuI)( $\mu$ -N<sup>t</sup>Bu)<sub>2</sub>P(CH<sub>3</sub>)N(H)<sup>t</sup>Bu}(Cl)] (7).**

To a solution of *cis*-[<sup>t</sup>BuN(H)P( $\mu$ -N<sup>t</sup>Bu)<sub>2</sub>P(CH<sub>3</sub>)N(H)<sup>t</sup>Bu}(I)] (0.034 g, 0.069 mmol) in 4 mL of dichloromethane added a solution of [(Me<sub>2</sub>S)AuCl] (0.020 g, 0.069 mmol) also in dichloromethane (8 mL) at room temperature. The reaction mixture was stirred for 4 h. The clear solution obtained was concentrated to a small bulk under reduced pressure and layered with petroleum ether to get **11** as colorless crystalline solid. Yield: 85% (0.043 g, 0.059 mmol). Mp: 190-192 °C (dec). <sup>1</sup>H NMR (400 MHz, CDCl<sub>3</sub>,  $\delta$ ): 8.11 (d, <sup>2</sup>J<sub>PH</sub> = 9.6 Hz, NH, 1H), 2.23 (d, <sup>2</sup>J<sub>PH</sub> = 15.2 Hz, NH, 1H), 1.69 (s, CH<sub>3</sub>, 3H), 1.63 (s, <sup>t</sup>Bu, 18H), 1.60 (s, <sup>t</sup>Bu, 9H), 1.52 (s, <sup>t</sup>Bu, 9H). <sup>31</sup>P{<sup>1</sup>H} NMR (161.8 MHz, CDCl<sub>3</sub>,  $\delta$ ): 82.4 (s), 30.0 (d, <sup>2</sup>J<sub>PP</sub> = 5.5 Hz). ES (EI): 687.1 (m/e – Cl). Anal. Calcd. for C<sub>17</sub>H<sub>41</sub>N<sub>4</sub>P<sub>2</sub>AuCl : C, 28.24; H, 5.71; N, 7.75%. Found: C, 27.91; H, 5.88; N, 7.43%.

**Synthesis of *cis*-[<sup>t</sup>(Me<sub>2</sub>NC<sub>4</sub>H<sub>8</sub>N)P(AuI)( $\mu$ -N<sup>t</sup>Bu)<sub>2</sub>P(CH<sub>3</sub>)(NC<sub>4</sub>H<sub>8</sub>NMe<sub>2</sub>)}(I)<sub>2</sub>(Cl)] (8).**

To a solution of *cis*-[<sup>t</sup>(Me<sub>2</sub>NC<sub>4</sub>H<sub>8</sub>N)P( $\mu$ -N<sup>t</sup>Bu)<sub>2</sub>P(CH<sub>3</sub>)(NC<sub>4</sub>H<sub>8</sub>NMe<sub>2</sub>)}(I)<sub>3</sub>] (0.034 g, 0.041 mmol) in 6 mL of methanol was added a solution of [(Me<sub>2</sub>S)AuCl] (0.012 g, 0.041 mmol) in dichloromethane (4 mL). The reaction mixture was stirred at room temperature for 4 h. All the volatiles were removed under vacuum and the residue obtained was extracted with 5 mL dichloromethane and cooled to 0 °C to afford **6** as analytically pure crystalline solid. Yield: 78% (0.034 g, 0.0319 mmol). Mp: 190-192 °C (dec). <sup>1</sup>H NMR (400 MHz, DMSO-d<sub>6</sub>):  $\delta$  3.66-3.44 (m, C<sub>4</sub>H<sub>8</sub>, 16H), 2.44 (s, NMe<sub>2</sub>, 6H), 2.43 (s, NMe<sub>2</sub>, 6H), 1.52 (s, CH<sub>3</sub>, 3H), 1.36 (s, <sup>t</sup>Bu, 18H). <sup>31</sup>P{<sup>1</sup>H} NMR (161.8 MHz, DMSO-d<sub>6</sub>):  $\delta$  88.5 (s), 37.7 (s). Anal. Calcd. for C<sub>21</sub>H<sub>49</sub>P<sub>2</sub>N<sub>6</sub>AuClI<sub>3</sub>: C, 23.77; H, 4.65; N, 7.92%. Found: C, 23.58; H, 5.96; N, 8.51%.

**Synthesis of *cis*-[ $\{\mu\text{-N}^t\text{BuP}\}_2(\text{OCH}_2\text{CH}_2\text{NMe}_3)_2\text{Au}_2\text{I}_2\}\text{(Cl)}_2$ ] (**9**).**

In a manner identical to that used for the synthesis of **12**, *cis*-[ $\{\mu\text{-N}^t\text{BuP}\}_2(\text{OCH}_2\text{CH}_2\text{NMe}_3)_2\}\text{(I)}_2$ ] (0.025 g, 0.038 mmol) and [(Me<sub>2</sub>S)AuCl] (0.022 g, 0.075 mmol) were allowed to react. Yield: 88% (0.038 g, 0.034 mmol). Mp: 168-170 °C (dec). <sup>1</sup>H NMR (400 MHz, D<sub>2</sub>O, δ): 4.70 (t, *J*<sub>HH</sub> = 8.2 Hz, *OCH*<sub>2</sub>, 4H), 3.82 (t, *J*<sub>HH</sub> = 9.6 Hz, *NCH*<sub>2</sub>, 4H), 3.18 (s, *Nme*, 18H), 1.57 (s, *tBu*, 18H). <sup>31</sup>P{<sup>1</sup>H} NMR (161.8 MHz, DMSO-d<sub>6</sub>, δ): 110.3 (s). Anal. Calcd. for C<sub>18</sub>H<sub>44</sub>N<sub>4</sub>P<sub>2</sub>O<sub>2</sub>Au<sub>2</sub>Cl<sub>2</sub>I<sub>2</sub>: C, 19.14; H, 3.92; N, 4.96%. Found: C, 19.25; H, 3.78; N, 4.72%.

**Cell culture and cell proliferation assay.**

HeLa cells were grown in minimal essential medium (Hi Media, Mumbai) supplemented with 10 % (v/v) fetal bovine serum and sodium bicarbonate (2.0 mg/mL) in the presence of antibiotics.<sup>6</sup> HCT-116 (Human colon carcinoma cell line containing wild type p53) cells were grown in DMEM containing 10% (v/v) fetal bovine serum and sodium bicarbonate (2.0 mg/mL) in the presence of antibiotics. The effects of different compounds on HeLa cell proliferation were determined in 96-well tissue culture plates by SRB assay. DMSO (0.1 %) alone was used as a vehicle control.

**Immunofluorescence microscopy.**

HCT-116 cells (6 X 10<sup>4</sup> cells/mL) were seeded on glass coverslips in 24- well tissue culture plates and treated with different drugs dissolved in 100 % DMSO. The final DMSO concentration in all the experiments was 0.1 %. After 24 h of the drug treatment, cells were fixed in 3.7 % formaldehyde for 30 minutes at 25 °C and processed for immunofluorescence microscopy to visualize p53.<sup>7</sup> The processed coverslips were observed by using a 40 X objective in a Nikon Eclipse TE 2000U microscope

(Kanagawa, Japan). The images were analyzed by using Image Pro-Plus software (Media Cybernetics, Silver Spring, MD).

**Annexin V/Propidium iodide staining.**

HeLa cells ( $6 \times 10^4$  cells/mL) were seeded on glass coverslips in 24- well tissue culture plates. Twenty four hours after seeding the old media was replaced with fresh media containing no compound or 20  $\mu$ M of compound 411 and 320 and incubated for an additional 24 h. The cells were then centrifuged in a Labofuge 400R cytospin (Heraeus, Hanau/Germany) for 10 min to attach the floating cells on the coverslips. The cells were stained using the annexin V apoptosis kit (Santa Cruz Biotechnology, CA, USA) according to the instructions provided with the kit and observed immediately using the Nikon Eclipse TE-2000 U microscope.<sup>8</sup>

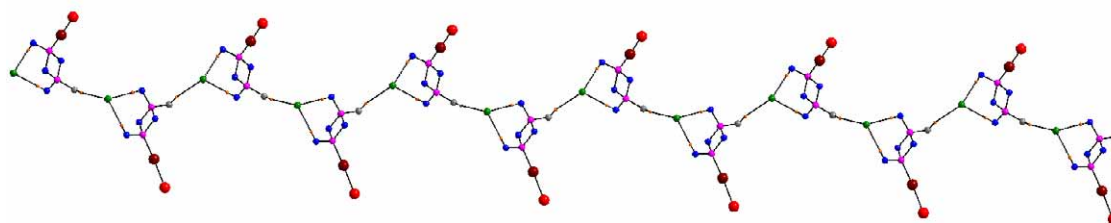

**Fig 1.** Ball and stick representation of one-dimensional polymeric sheet like structure of **7** due to inter- and intramolecular hydrogen bonding.

**Table 1** Crystallographic Data for **2** and **7**

|                                               | <b>2</b>                                                          | <b>7</b>                                                              |
|-----------------------------------------------|-------------------------------------------------------------------|-----------------------------------------------------------------------|
| formula                                       | C <sub>17</sub> H <sub>41</sub> N <sub>4</sub> P <sub>2</sub> , I | C <sub>17</sub> H <sub>41</sub> AuIN <sub>4</sub> P <sub>2</sub> , Cl |
| fw                                            | 490.38                                                            | 722.80                                                                |
| crystal system                                | Orthorhombic                                                      | Monoclinic                                                            |
| space group                                   | Pbca (No. 61)                                                     | P2 <sub>1</sub> /a (No. 14)                                           |
| <i>a</i> , Å                                  | 14.090(3)                                                         | 15.5625(7)                                                            |
| <i>b</i> , Å                                  | 25.9449(18)                                                       | 11.9084(13)                                                           |
| <i>c</i> , Å                                  | 27.452(3)                                                         | 15.895(2)                                                             |
| <i>α</i> , deg                                | 90                                                                | 90                                                                    |
| <i>β</i> , deg                                | 90                                                                | 118.376(3)                                                            |
| <i>γ</i> , deg                                | 90                                                                | 90                                                                    |
| <i>V</i> , Å <sup>3</sup>                     | 10036(3)                                                          | 2591.9(5)                                                             |
| <i>Z</i>                                      | 16                                                                | 4                                                                     |
| <i>ρ</i> <sub>calc</sub> , g cm <sup>-3</sup> | 1.298                                                             | 1.852                                                                 |
| <i>μ</i> (MoKa), mm <sup>-1</sup>             | 1.411                                                             | 7.104                                                                 |
| <i>F</i> (000)                                | 4064                                                              | 1400                                                                  |
| crystal size mm <sup>3</sup>                  | 0.09 × 0.16 × 0.33                                                | 0.21 × 0.26 × 0.33                                                    |
| <i>T</i> , K                                  | 150                                                               | 293                                                                   |
| 2 <i>θ</i> range, deg                         | 3.0, 25.0                                                         | 3.1, 25.0                                                             |
| Total no. reflns                              | 61951                                                             | 14699                                                                 |
| No. of indep. reflns                          | 8818, [R <sub>(int)</sub> = 0.060]                                | 4359, [R <sub>(int)</sub> = 0.085]                                    |
| R1 <sup>a</sup>                               | 0.0296                                                            | 0.0432                                                                |
| wR2 <sup>b</sup>                              | 0.0606                                                            | 0.1229                                                                |
| GOF (F <sup>2</sup> )                         | 0.831                                                             | 1.071                                                                 |

$$^a R = \sum |F_o| - |F_c| / \sum |F_o|$$

$$^b wR_2 = \{ [\sum w(F_o^2 - F_c^2) / \sum w(F_o^2)^2] \}^{1/2}; w = 1 / [\sigma^2(F_o^2) + (xP)^2] \text{ where } P = (F_o^2 + 2F_c^2) / 3$$

**Reference:**

1. I. Schranz, L. Stahl and R. J. Staples, *Inorg. Chem.*, 1998, **37**, 1493-1498.
2. D. Suresh, M. S. Balakrishna and J. T. Mague, *unpublished results*.
3. P. Chandrasekaran, J. T. Mague and M. S. Balakrishna, *Inorg. Chem.*, 2005, **44**, 7925-7932.
4. P. Chandrasekaran, J. T. Mague and M. S. Balakrishna, *Inorg. Chem.*, 2006, **45**, 5893-5897.
5. M. C. Brandys, M. C. Jennings and R. J. Puddephatt, *J. Chem. Soc., Dalton Trans.*, 2000, 4601–4606.
6. K. Rathinasamy and D. Panda, *FEBS J.*, 2006, **273**, 4114-4128.
7. S. Ray, R. Mohan, J. K. Singh, M. K. Samantaray, M. M. Shaikh, D. Panda and P. Ghosh, *J. Am. Chem. Soc.*, 2007, **129**, 15042-15053.
8. P. Srivastava and D. Panda, *FEBS J.*, 2007, **274**, 4788.
